# Supplementary material
Source: PubMed Central journal article supplement (PMC2939219)
Supplement: NIHMS100702-supplement-supplement_1.pdf [file NIHMS100702-supplement-supplement_1.pdf]

## Supplementary Material

# An Efficient Approach to Sulfate Metabolites of Polychlorinated Biphenyls

Xueshu Li,<sup>a</sup> Sean Parkin,<sup>b</sup> Michael W. Duffel,<sup>c</sup> Larry W. Robertson,<sup>a</sup>  
Hans-Joachim Lehmler<sup>\*a</sup>

<sup>a</sup> Department of Occupational and Environmental Health, College of Public Health, The University of Iowa, Iowa City, IA, 52242, USA; <sup>b</sup> Department of Chemistry, College of Arts and Sciences, University of Kentucky, Lexington, KY, 40506, USA;

<sup>c</sup> Division of Medicinal and Natural Products Chemistry, College of Pharmacy, The University of Iowa, Iowa City, IA, 52242, USA

Corresponding Author:  
Hans-Joachim Lehmler  
Department of Occupational and Environmental Health,  
College of Public Health  
The University of Iowa  
100 Oakdale Campus #221 IREH  
Iowa City, IA 52242-5000  
Phone +1 (319) 335-4211  
Fax: +1 (319) 335-1-319-4290

e-mail: [hans-joachim-lehmler@uiowa.edu](mailto:hans-joachim-lehmler@uiowa.edu)

## Contents:

### 1. TCE PCB/phenol sulfate diesters

|                                                                                                       |    |
|-------------------------------------------------------------------------------------------------------|----|
| 1.1. Sulfuric acid 4-bromo-2-chlorophenyl 2,2,2-trichloroethyl ester ( <b>2a</b> ).....               | S3 |
| 1.2. Sulfuric acid 2,6-dichlorophenyl 2,2,2-trichloroethyl ester ( <b>2b</b> ).....                   | S3 |
| 1.3. Sulfuric acid biphenyl-4-yl 2,2,2-trichloroethyl ester ( <b>8a</b> ).....                        | S3 |
| 1.4. Sulfuric acid 4'-chloro-biphenyl-3-yl 2,2,2-trichloroethyl ester ( <b>8c</b> ).....              | S4 |
| 1.5. Sulfuric acid 4'-chloro-biphenyl-2-yl 2,2,2-trichloroethyl ester ( <b>8d</b> ).....              | S4 |
| 1.6. Sulfuric acid 2',5'-dichloro-biphenyl-4-yl 2,2,2-trichloroethyl ester ( <b>8e</b> ).....         | S4 |
| 1.7. Sulfuric acid 2,4'-dichloro-biphenyl-4-yl 2,2,2-trichloroethyl ester ( <b>8f</b> ).....          | S5 |
| 1.8. Sulfuric acid 3',4'-dichloro-biphenyl-4-yl 2,2,2-trichloroethyl ester ( <b>8g</b> ).....         | S5 |
| 1.9. Sulfuric acid 2,3',4'-trichloro-biphenyl-4-yl 2,2,2-trichloroethyl ester ( <b>8h</b> ).....      | S5 |
| 1.10. Sulfuric acid 2',3,5'-trichloro-biphenyl-4-yl 2,2,2-trichloroethyl ester ( <b>8i</b> ).....     | S6 |
| 1.11. Sulfuric acid 2',3,4'-trichloro-biphenyl-4-yl 2,2,2-trichloroethyl ester ( <b>8j</b> ).....     | S6 |
| 1.12. Sulfuric acid 2',3,5,5'-tetrachloro-biphenyl-4-yl 2,2,2-trichloroethyl ester ( <b>8k</b> )..... | S6 |
| 1.13. Sulfuric acid 2',3,4',5-tetrachloro-biphenyl-4-yl 2,2,2-trichloroethyl ester ( <b>8l</b> )..... | S7 |

### 2. PCB sulfate monoesters

|                                                                                                     |     |
|-----------------------------------------------------------------------------------------------------|-----|
| 2.1. Sulfuric acid mono-biphenyl-4-yl ester, ammonium salt<br>( <b>9 a</b> ) .....                  | S 7 |
| 2.2. Sulfuric acid mono-(4'-chloro-biphenyl-3-yl) ester, ammonium salt<br>( <b>9 c</b> ) .....      | S 8 |
| 2.3. Sulfuric acid mono-(4'-chloro-biphenyl-2-yl) ester, ammonium salt<br>( <b>9 d</b> ) .....      | S 8 |
| 2.4. Sulfuric acid mono-(2',5'-dichloro-biphenyl-4-yl) ester, ammonium salt<br>( <b>9 e</b> ) ..... | S 8 |

|                                                                                                            |       |
|------------------------------------------------------------------------------------------------------------|-------|
| 2.5. Sulfuric acid mono-(2,4'-dichloro-biphenyl-4-yl) ester, ammonium salt<br>( <b>9 f</b> ) . . . . .     | S 9   |
| 2.6. Sulfuric acid mono-(3',4'-dichloro-biphenyl-4-yl) ester, ammonium salt<br>( <b>9 g</b> ) . . . . .    | S 9   |
| 2.7. Sulfuric acid mono-(2,3',4'-trichloro-biphenyl-4-yl) ester, ammonium salt<br>( <b>9 h</b> ) . . . . . | S 9   |
| 2.8. Sulfuric acid mono-(2',3,5'-trichloro-biphenyl-4-yl) ester, ammonium salt<br>( <b>9 i</b> ) . . . . . | S 1 0 |
| 2.9. Sulfuric acid mono-(2',3,4'-trichloro-biphenyl-4-yl) ester, ammonium salt<br>( <b>9 j</b> ) . . . . . | S 1 0 |

ACCEPTED MANUSCRIPT

## 1. TCE PCB/Phenol sulfate diesters

### 1.1. Sulfuric acid 4-bromo-2-chlorophenyl 2,2,2-trichloroethyl ester (2a)

White solid; mp: 58-60 °C;  $^1\text{H}$  NMR (400 MHz,  $\text{CDCl}_3$ ):  $\delta$ /ppm 4.92 (s, 2H,  $\text{CH}_2$ ), 7.39 (dd, 1H,  $J = 8.8$  Hz,  $J = 0.4$  Hz), 7.46 (dd, 1H,  $J = 8.8$  Hz,  $J = 2.3$  Hz), 7.65 (dd, 1H,  $J = 2.3$  Hz,  $J = 0.4$  Hz).  $^{13}\text{C}$  NMR (100 MHz,  $\text{CDCl}_3$ ):  $\delta$ /ppm 80.8 ( $\text{CH}_2$ ), 92.2 ( $\text{CCl}_3$ ), 121.3, 124.0 (CH), 127.9, 131.4 (CH), 133.7 (CH), 145.1 ( $\text{C}_{\text{Ar}}\text{-OSO}_3$ ). IR (film): 3092, 3019, 2966, 1472, 1424, 1187, 1001, 886  $\text{cm}^{-1}$ . EI-MS  $m/z$  (relative intensity, %): 416 (9,  $\text{C}_8\text{H}_5\text{BrCl}_4\text{O}_4\text{S}^{*+}$ ), 286 (8), 206 (80), 177 (22), 131 (11), 63 (20).

### 1.2. Sulfuric acid 2,6-dichlorophenyl 2,2,2-trichloroethyl ester (2b)

White solid; mp: 50-51 °C;  $^1\text{H}$  NMR (400 MHz,  $\text{CDCl}_3$ ):  $\delta$ /ppm 5.03 (s, 2H,  $\text{CH}_2$ ), 7.21 (dd, 1H,  $J = 7.7$  Hz,  $J = 8.6$  Hz), 7.39 (d, 2H,  $J \sim 8.6$  Hz).  $^{13}\text{C}$  NMR (100 MHz,  $\text{CDCl}_3$ ):  $\delta$ /ppm 80.8 ( $\text{CH}_2$ ), 92.4 ( $\text{CCl}_3$ ), 128.8 (CH), 129.5 ( $2\times\text{CH}$  and  $2\times\text{C}$ ), 143.4 ( $\text{C}_{\text{Ar}}\text{-OSO}_3$ ). IR (film): 3085, 3017, 2964, 1442, 1423, 1203, 1005, 882  $\text{cm}^{-1}$ . EI-MS  $m/z$  (relative intensity, %): 372 (9,  $\text{C}_8\text{H}_5\text{Cl}_5\text{O}_4\text{S}^{*+}$ ), 162 (100), 131 (12), 73 (13), 63 (17).

### 1.3. Sulfuric acid biphenyl-4-yl 2,2,2-trichloroethyl ester (8a)

White solid; mp: 89-90 °C;  $^1\text{H}$  NMR (400 MHz,  $\text{CDCl}_3$ ):  $\delta$ /ppm 4.86 (s, 2H,  $\text{CH}_2$ ), 7.37 (m, 1H,  $J \sim 7.7$  Hz), 7.41 (AA'XX' system, 2H,  $J \sim 8.0$  Hz), 7.45 (AA'XX' system, 2H,  $J \sim 8.0$  Hz), 7.54 (AA'XX' system, 2H,  $J \sim 8.0$  Hz), 7.62 (AA'XX' system, 2H,  $J \sim 8.0$  Hz).  $^{13}\text{C}$  NMR (100 MHz,  $\text{CDCl}_3$ ):  $\delta$ /ppm 80.5 ( $\text{CH}_2$ ), 92.5 ( $\text{CCl}_3$ ), 121.3 ( $2\times\text{CH}$ ), 127.2 ( $2\times\text{CH}$ ), 127.9 (CH), 128.8 ( $2\times\text{CH}$ ), 129.0 ( $2\times\text{CH}$ ), 139.6, 141.2, 149.6 ( $\text{C}_{\text{Ar}}\text{-OSO}_3$ ). IR (film): 3077, 2969, 1414,

1204, 1091, 989, 869, 845, 794  $\text{cm}^{-1}$ . EI-MS  $m/z$  (relative intensity, %): 380 (25,  $\text{C}_{14}\text{H}_{11}\text{Cl}_3\text{O}_4\text{S}^{+}$ ), 250 (15), 169 (100), 139 (14), 115 (50).

#### 1.4. Sulfuric acid 4'-chloro-biphenyl-3-yl 2,2,2-trichloroethyl ester (8c)

White solid; mp: 79-80  $^{\circ}\text{C}$ ;  $^1\text{H}$  NMR (400 MHz,  $\text{CDCl}_3$ ):  $\delta/\text{ppm}$  4.85 (s, 2H,  $\text{CH}_2$ ), 7.34 (ddd, 1H,  $J = 1.5$  Hz,  $J = 2.5$  Hz,  $J = 7.8$  Hz), 7.42 (AA'XX' system, 2H,  $J \sim 8.7$  Hz), 7.49 (AA'XX' system, 2H,  $J \sim 8.7$  Hz), 7.48-7.54 (m, 3H).  $^{13}\text{C}$  NMR (100 MHz,  $\text{CDCl}_3$ ):  $\delta/\text{ppm}$  80.4 ( $\text{CH}_2$ ), 92.3 ( $\text{CCl}_3$ ), 119.6 (CH), 119.9 (CH), 126.4 (CH), 128.4 ( $2\times\text{CH}$ ), 129.2 ( $2\times\text{CH}$ ), 130.5 (CH), 134.5, 137.7, 142.5, 150.5 ( $\text{C}_{\text{Ar}}\text{-OSO}_3$ ). IR (film): 3077, 3063, 3022, 2975, 1418, 1197, 991  $\text{cm}^{-1}$ . EI-MS  $m/z$  (relative intensity, %): 414 (25,  $\text{C}_{14}\text{H}_{10}\text{Cl}_4\text{O}_4\text{S}^{+}$ ), 284 (20), 217 (10), 204 (100), 175 (35), 149 (15), 139 (30).

#### 1.5. Sulfuric acid 4'-chloro-biphenyl-2-yl 2,2,2-trichloroethyl ester (8d)

White solid; mp: 70-71  $^{\circ}\text{C}$ ;  $^1\text{H}$  NMR (400 MHz,  $\text{CDCl}_3$ ):  $\delta/\text{ppm}$  4.22 (s, 2H,  $\text{CH}_2$ ), 7.41-7.47 (m, 7H), 7.56 (ddd, 1H,  $J = 0.9$  Hz,  $J = 1.2$  Hz,  $J = 7.5$  Hz).  $^{13}\text{C}$  NMR (100 MHz,  $\text{CDCl}_3$ ):  $\delta/\text{ppm}$  79.9 ( $\text{CH}_2$ ), 92.3 ( $\text{CCl}_3$ ), 122.1 (CH), 128.1 (CH), 128.9 ( $2\times\text{CH}$ ), 129.5 (CH), 130.8 ( $2\times\text{CH}$ ), 131.5 (CH), 133.9, 134.6, 134.7, 147.0 ( $\text{C}_{\text{Ar}}\text{-OSO}_3$ ). IR (film): 3070, 3031, 2960, 1474, 1423, 1208, 1159, 1090, 1009, 884, 835  $\text{cm}^{-1}$ . EI-MS  $m/z$  (relative intensity, %): 414 (29,  $\text{C}_{14}\text{H}_{10}\text{Cl}_4\text{O}_4\text{S}^{+}$ ), 284 (15), 203 (50), 168 (100), 139 (30).

#### 1.6. Sulfuric acid 2',5'-dichloro-biphenyl-4-yl 2,2,2-trichloroethyl ester (8e)

White solid; mp: 89-90  $^{\circ}\text{C}$ ;  $^1\text{H}$  NMR (400 MHz,  $\text{CDCl}_3$ ):  $\delta/\text{ppm}$  4.85 (s, 2H,  $\text{CH}_2$ ), 7.28 (dd, 1H,  $J = 2.4$  Hz,  $J = 8.5$  Hz), 7.32 (d, 1H,  $J = 2.4$  Hz), 7.40 (d, 1H,  $J = 8.5$  Hz), 7.43

(AA'XX' system, 2H,  $J \sim 8.9$  Hz), 7.48 (AA'XX' system, 2H,  $J \sim 8.9$  Hz).  $^{13}\text{C}$  NMR (100 MHz,  $\text{CDCl}_3$ ):  $\delta/\text{ppm}$  80.5 ( $\text{CH}_2$ ), 92.4 ( $\text{CCl}_3$ ), 120.9 ( $2\times\text{CH}$ ), 129.1 ( $\text{CH}$ ), 130.8, 131.0 ( $\text{CH}$ ), 131.1 ( $2\times\text{CH}$ ), 131.2 ( $\text{CH}$ ), 132.9, 137.9, 140.3, 149.9 ( $\text{C}_{\text{Ar}}\text{-OSO}_3$ ). IR (film): 3075, 3010, 2954, 1459, 1423, 1213, 1181, 1149, 1098, 1026, 1005, 889  $\text{cm}^{-1}$ . EI-MS  $m/z$  (relative intensity, %): 448 (25,  $\text{C}_{14}\text{H}_9\text{Cl}_5\text{O}_4\text{S}^{+}$ ), 318 (35), 238 (100), 209 (35), 183 (16), 173 (20), 149 (17), 139 (35).

### 1.7. Sulfuric acid 2,4'-dichloro-biphenyl-4-yl 2,2,2-trichloroethyl ester (8f)

Viscous liquid;  $^1\text{H}$  NMR (400 MHz,  $\text{CDCl}_3$ ):  $\delta/\text{ppm}$  4.88 (s, 2H,  $\text{CH}_2$ ), 7.32-7.42 (m, 6H), 7.51 (d, 1H,  $J = 2.5$  Hz).  $^{13}\text{C}$  NMR (100 MHz,  $\text{CDCl}_3$ ):  $\delta/\text{ppm}$  80.6 ( $\text{CH}_2$ ), 92.3 ( $\text{CCl}_3$ ), 119.7 ( $\text{CH}$ ), 122.9 ( $\text{CH}$ ), 128.5 ( $2\times\text{CH}$ ), 130.6 ( $2\times\text{CH}$ ), 132.2 ( $\text{CH}$ ), 133.7, 134.5, 136.2, 139.3, 149.3 ( $\text{C}_{\text{Ar}}\text{-OSO}_3$ ). IR (film): 3094, 2958, 1587, 1475, 1423, 1215, 1171, 1003  $\text{cm}^{-1}$ . EI-MS  $m/z$  (relative intensity, %): 448 (30,  $\text{C}_{14}\text{H}_9\text{Cl}_5\text{O}_4\text{S}^{+}$ ), 318 (36), 251 (12), 238 (100), 209 (38), 173 (18), 139 (45).

### 1.8. Sulfuric acid 3',4'-dichloro-biphenyl-4-yl 2,2,2-trichloroethyl ester (8g)

White solid; mp: 84-85  $^{\circ}\text{C}$ ;  $^1\text{H}$  NMR (400 MHz,  $\text{CDCl}_3$ ):  $\delta/\text{ppm}$  4.87 (s, 2H,  $\text{CH}_2$ ), 7.38 (dm, 1H,  $J \sim 9.0$  Hz), 7.45 (AA'XX' system, 2H,  $J \sim 8.5$  Hz), 7.52 (d, 1H,  $J \sim 8.4$  Hz), 7.59 (AA'XX' system, 2H,  $J \sim 8.6$  Hz), 7.64 (m, 1H).  $^{13}\text{C}$  NMR (100 MHz,  $\text{CDCl}_3$ ):  $\delta/\text{ppm}$  80.5 ( $\text{CH}_2$ ), 92.4 ( $\text{CCl}_3$ ), 121.7 ( $2\times\text{CH}$ ), 126.3 ( $\text{CH}$ ), 128.7 ( $2\times\text{CH}$ ), 129.0 ( $\text{CH}$ ), 130.9 ( $\text{CH}$ ), 132.3, 133.2, 138.7, 139.5, 150.0 ( $\text{C}_{\text{Ar}}\text{-OSO}_3$ ). IR (film): 3070, 3007, 2955, 1478, 1417, 1375, 1217, 1141, 1087, 1013, 901, 881  $\text{cm}^{-1}$ . EI-MS  $m/z$  (relative intensity, %): 448 (23,  $\text{C}_{14}\text{H}_9\text{Cl}_5\text{O}_4\text{S}^{+}$ ), 318 (30), 238 (100), 209 (47), 183 (15), 173 (16), 139 (40).

**1.9. Sulfuric acid 2,3',4'-trichloro-biphenyl-4-yl 2,2,2-trichloroethyl ester (8h)**

Viscous liquid;  $^1\text{H}$  NMR (400 MHz,  $\text{CDCl}_3$ ):  $\delta/\text{ppm}$  4.90 (s, 2H,  $\text{CH}_2$ ), 7.26 (dd, 1H,  $J = 2.3$  Hz,  $J = 8.4$  Hz), 7.36 (dd, 1H,  $J = 2.3$  Hz,  $J = 8.6$  Hz), 7.39 (dd, 1H,  $J = 0.4$  Hz,  $J = 8.6$  Hz), 7.50-7.50 (m, 3H).  $^{13}\text{C}$  NMR (100 MHz,  $\text{CDCl}_3$ ):  $\delta/\text{ppm}$  80.5 ( $\text{CH}_2$ ), 92.1 ( $\text{CCl}_3$ ), 119.8 (CH), 122.9 (CH), 128.7 (CH), 130.2 (CH), 131.1 (CH), 132.1 (CH), 132.4, 132.5, 133.5, 137.5, 137.9, 149.3 ( $\text{C}_{\text{Ar}}\text{-OSO}_3$ ). IR (film): 2954, 2919, 1458, 1429, 1212, 1177, 1000, 919  $\text{cm}^{-1}$ . EI-MS  $m/z$  (relative intensity, %): 482 (15,  $\text{C}_{14}\text{H}_8\text{Cl}_6\text{O}_4\text{S}^{*+}$ ), 352 (31), 272 (100), 243 (33), 173 (47).

**1.10. Sulfuric acid 2',3,5'-trichloro-biphenyl-4-yl 2,2,2-trichloroethyl ester (8i)**

Viscous liquid;  $^1\text{H}$  NMR (400 MHz,  $\text{CDCl}_3$ ):  $\delta/\text{ppm}$  5.00 (s, 2H,  $\text{CH}_2$ ), 7.29-7.32 (m, 2H), 7.40 (dd, 1H,  $J = 2.2$  Hz,  $J = 8.4$  Hz), 7.41 (d, 1H,  $J \sim 9.0$  Hz), 7.56 (d, 1H,  $J \sim 2.2$  Hz), 7.61 (d, 1H,  $J \sim 8.4$  Hz).  $^{13}\text{C}$  NMR (100 MHz,  $\text{CDCl}_3$ ):  $\delta/\text{ppm}$  80.6 ( $\text{CH}_2$ ), 92.1 ( $\text{CCl}_3$ ), 122.5 (CH), 126.4, 129.3 (CH), 129.5 (CH), 130.6, 130.8 (CH), 131.2 (CH), 131.8 (CH), 132.9, 138.8, 138.9, 145.4 ( $\text{C}_{\text{Ar}}\text{-OSO}_3$ ). IR (film): 3072, 3024, 2961, 1460, 1424, 1218, 1190, 1002, 886  $\text{cm}^{-1}$ . EI-MS  $m/z$  (relative intensity, %): 482 (23,  $\text{C}_{14}\text{H}_8\text{Cl}_6\text{O}_4\text{S}^{*+}$ ), 352 (12), 272 (100), 243 (30), 173 (42).

**1.11. Sulfuric acid 2',3,4'-trichloro-biphenyl-4-yl 2,2,2-trichloroethyl ester (8j)**

White solid; mp: 38-40  $^\circ\text{C}$ ;  $^1\text{H}$  NMR (400 MHz,  $\text{CDCl}_3$ ):  $\delta/\text{ppm}$  4.98 (s, 2H,  $\text{CH}_2$ ), 7.25 (d, 1H,  $J = 8.5$  Hz), 7.32 (dd, 1H,  $J = 2.1$  Hz,  $J = 8.5$  Hz), 7.39 (dd, 1H,  $J = 2.1$  Hz,  $J = 8.5$  Hz), 7.49 (d, 1H,  $J = 2.1$  Hz), 7.55 (d, 1H,  $J = 2.1$  Hz), 7.60 (d, 1H,  $J = 8.5$  Hz).  $^{13}\text{C}$  NMR (100 MHz,  $\text{CDCl}_3$ ):  $\delta/\text{ppm}$  80.6 ( $\text{CH}_2$ ), 92.1 ( $\text{CCl}_3$ ), 122.5 (CH), 126.3, 127.4 (CH), 129.3 (CH), 129.9 (CH), 131.7 (CH), 131.8 (CH), 132.9, 134.8, 136.0, 138.9, 145.3 ( $\text{C}_{\text{Ar}}\text{-OSO}_3$ ). IR (film): 2966,

2914, 1463, 1425, 1191, 1003  $\text{cm}^{-1}$ . EI-MS  $m/z$  (relative intensity, %): 482 (15,  $\text{C}_{14}\text{H}_8\text{Cl}_6\text{O}_4\text{S}^{++}$ ), 272 (100), 243 (36), 173 (43).

### 1.12. Sulfuric acid 2',3,5,5'-tetrachloro-biphenyl-4-yl 2,2,2-trichloroethyl ester (8k)

White solid; mp: 120-121  $^{\circ}\text{C}$ ;  $^1\text{H}$  NMR (400 MHz,  $\text{CDCl}_3$ ):  $\delta/\text{ppm}$  5.07 (s, 2H,  $\text{CH}_2$ ), 7.31-7.36 (m, 2H), 7.43 (m, 1H), 7.49 (m, 2H).  $^{13}\text{C}$  NMR (100 MHz,  $\text{CDCl}_3$ ):  $\delta/\text{ppm}$  81.0 ( $\text{CH}_2$ ), 92.4 ( $\text{CCl}_3$ ), 129.4, 130.0 (CH), 130.3 ( $2\times\text{CH}$ ), 130.7, 130.8 (CH), 131.4 (CH), 133.2, 138.1, 139.1 ( $2\times\text{C}$ ), 143.2 ( $\text{C}_{\text{Ar}}\text{-OSO}_3$ ). IR (film): 3096, 3018, 2967, 1454, 1425, 1196, 1010, 902, 873, 854  $\text{cm}^{-1}$ . EI-MS  $m/z$  (relative intensity, %): 516 (13,  $\text{C}_{14}\text{H}_7\text{Cl}_7\text{O}_4\text{S}^{++}$ ), 305 (85), 279 (23), 207 (37). HRMS (EI): found  $m/z$  515.7855, calculated for ( $\text{C}_{14}\text{H}_7(35)\text{Cl}_7\text{O}_4\text{S}^{++}$ ) 515.7885.

### 1.13. Sulfuric acid 2',3,4',5-tetrachloro-biphenyl-4-yl 2,2,2-trichloroethyl ester (8l)

White solid; mp: 94-95  $^{\circ}\text{C}$ ;  $^1\text{H}$  NMR (400 MHz,  $\text{CDCl}_3$ ):  $\delta/\text{ppm}$  5.05 (s, 2H,  $\text{CH}_2$ ), 7.24 (d, 1H,  $J = 8.2$  Hz), 7.34 (dd, 1H,  $J = 2.0$  Hz,  $J = 8.2$  Hz), 7.46 (s, 2H), 7.52 (d, 1H,  $J = 2.0$  Hz).  $^{13}\text{C}$  NMR (100 MHz,  $\text{CDCl}_3$ ):  $\delta/\text{ppm}$  81.0 ( $\text{CH}_2$ ), 92.4 ( $\text{CCl}_3$ ), 127.6 (CH), 129.3, 130.2 (CH), 130.4 ( $2\times\text{CH}$ ), 131.7 (CH), 133.1, 135.2, 135.5, 139.3 ( $2\times\text{C}$ ), 143.0 ( $\text{C}_{\text{Ar}}\text{-OSO}_3$ ). IR (film): 3066, 2971, 1450, 1199, 1009, 871, 841  $\text{cm}^{-1}$ . EI-MS  $m/z$  (relative intensity, %): 516 (6,  $\text{C}_{14}\text{H}_7\text{Cl}_7\text{O}_4\text{S}^{++}$ ), 305 (82), 279 (20), 207 (30). HRMS (EI): found  $m/z$  515.7884, calculated for ( $\text{C}_{14}\text{H}_7(35)\text{Cl}_7\text{O}_4\text{S}^{++}$ ) 515.7885.

## 2. PCB sulfate monoesters

### 2.1. Sulfuric acid mono-biphenyl-4-yl ester, ammonium salt (9a)



White solid; mp: 250 °C (dec.);  $^1\text{H}$  NMR (400 MHz,  $\text{CD}_3\text{OD}$ ):  $\delta/\text{ppm}$  7.30 (tm, 1H,  $J = 7.5$  Hz), 7.35-7.43 (m, 4H), 7.55-7.58 (m, 4H).  $^{13}\text{C}$  NMR (100 MHz,  $\text{CD}_3\text{OD}$ ):  $\delta/\text{ppm}$  122.8 (2 $\times$ CH), 127.9 (2 $\times$ CH), 128.2 (CH), 128.7 (2 $\times$ CH), 129.8 (2 $\times$ CH), 139.2, 141.2, 153.6 ( $\text{C}_{\text{Ar}}\text{-OSO}_3$ ). IR (KBr): 3194, 3076, 1237, 1071  $\text{cm}^{-1}$ . UV/Vis:  $\lambda_{9\text{a,max}}(\text{MeOH}) = 252$  nm,  $\epsilon_{9\text{a}} = 1.50 \times 10^4$   $\text{L}\cdot\text{mol}^{-1}\cdot\text{cm}^{-1}$  ( $\lambda_{7\text{a,max}}(\text{MeOH}) = 260$  nm,  $\epsilon_{7\text{a}} = 3.08 \times 10^4$   $\text{L}\cdot\text{mol}^{-1}\cdot\text{cm}^{-1}$ ). HRMS (ESI, negative):  $[\text{M-NH}_4]^-$  found  $m/z$  249.0242, calculated for  $\text{C}_{12}\text{H}_9\text{O}_4\text{S}$  249.0222.

## 2.2. Sulfuric acid mono-(4'-chloro-biphenyl-3-yl) ester, ammonium salt (9c)

White solid; mp: 250 °C (dec.);  $^1\text{H}$  NMR (400 MHz,  $\text{CD}_3\text{OD}$ ):  $\delta/\text{ppm}$  7.28-7.31 (m, 1H), 7.39-7.41 (m, 2H), 7.42 (AA'XX' system, 2H,  $J \sim 8.8$  Hz), 7.55-7.57 (m, 1H), 7.61 (AA'XX', 2H,  $J \sim 8.8$  Hz).  $^{13}\text{C}$  NMR (100 MHz,  $\text{CD}_3\text{OD}$ ):  $\delta/\text{ppm}$  121.0 (CH), 121.7 (CH), 124.2 (CH), 129.6 (2 $\times$ CH), 129.9 (2 $\times$ CH), 130.7 (CH), 134.7, 140.6, 142.4, 154.7 ( $\text{C}_{\text{Ar}}\text{-OSO}_3$ ). IR (KBr): 3231, 3084, 1251, 1212, 1066  $\text{cm}^{-1}$ . UV/Vis:  $\lambda_{9\text{c,max}}(\text{MeOH}) = 254$  nm,  $\epsilon_{9\text{c}} = 2.05 \times 10^4$   $\text{L}\cdot\text{mol}^{-1}\cdot\text{cm}^{-1}$  ( $\lambda_{7\text{c,max}}(\text{MeOH}) = 256$  nm,  $\epsilon_{7\text{c}} = 2.00 \times 10^4$   $\text{L}\cdot\text{mol}^{-1}\cdot\text{cm}^{-1}$ ). HRMS (ESI, negative):  $[\text{M-NH}_4]^-$  found  $m/z$  282.9836, calculated for  $\text{C}_{12}\text{H}_8(35)\text{ClO}_4\text{S}$  282.9832.

## 2.3. Sulfuric acid mono-(4'-chloro-biphenyl-2-yl) ester, ammonium salt (9d)

White solid; mp: 186-188 °C;  $^1\text{H}$  NMR (400 MHz,  $\text{CD}_3\text{OD}$ ):  $\delta/\text{ppm}$  7.21 (d"t", 1H,  $J = 1.3$  Hz,  $J = 7.6$  Hz), 7.30-7.35 (m, 2H), 7.37 (AA'XX' system, 2H,  $J \sim 8.8$  Hz), 7.57 (AA'XX' system, 2H,  $J \sim 8.8$  Hz), 7.71 (ddd, 1H,  $J = 0.6$  Hz,  $J = 1.3$  Hz,  $J = 8.0$  Hz).  $^{13}\text{C}$  NMR (100 MHz,  $\text{CD}_3\text{OD}$ ):  $\delta/\text{ppm}$  122.7 (CH), 126.0 (CH), 129.1 (2 $\times$ CH), 129.5 (CH), 131.6 (CH), 132.2

(2×CH), 134.0, 134.4, 138.4, 151.1 ( $C_{Ar}$ -OSO<sub>3</sub>). IR (KBr): 3180, 3072, 1254, 1046 cm<sup>-1</sup>. UV/Vis:  $\lambda_{9d,max}$ (MeOH) = 247 nm,  $\epsilon_{9d}$  = 1.68×10<sup>4</sup> L·mol<sup>-1</sup>·cm<sup>-1</sup> ( $\lambda_{7d,max}$ (MeOH) = 251 nm,  $\epsilon_{7d}$  = 1.50×10<sup>4</sup> L·mol<sup>-1</sup>·cm<sup>-1</sup>). HRMS (ESI, negative): [M-NH<sub>4</sub>]<sup>-</sup> found  $m/z$  282.9825, calculated for C<sub>12</sub>H<sub>8</sub>(35)ClO<sub>4</sub>S 282.9832.

#### 2.4. Sulfuric acid mono-(2',5'-dichloro-biphenyl-4-yl) ester, ammonium salt (9e)

White solid; mp: 230 °C (dec.); <sup>1</sup>H NMR (400 MHz, CD<sub>3</sub>OD):  $\delta$ /ppm 7.33 (dd, 1H,  $J$  = 2.6 Hz,  $J$  = 8.6 Hz), 7.36 (dd, 1H,  $J$  = 2.6 Hz,  $J$  = 0.4 Hz), 7.39 (m, 4H), 7.46 (dd, 1H,  $J$  = 0.4 Hz,  $J$  = 8.6 Hz). <sup>13</sup>C NMR (100 MHz, CD<sub>3</sub>OD):  $\delta$ /ppm 122.2 (2×CH), 129.7 (CH), 131.2 (2×CH), 132.1 (CH and C), 132.3 (CH), 133.9, 136.0, 143.0, 154.1 ( $C_{Ar}$ -OSO<sub>3</sub>). IR (KBr): 3496, 3272, 1242, 1070, 1020 cm<sup>-1</sup>. UV/Vis:  $\lambda_{9e,max}$ (MeOH) = 250 nm,  $\epsilon_{9e}$  = 1.03×10<sup>4</sup> L·mol<sup>-1</sup>·cm<sup>-1</sup> ( $\lambda_{7e,max}$ (MeOH) = 263 nm,  $\epsilon_{7e}$  = 1.49×10<sup>4</sup> L·mol<sup>-1</sup>·cm<sup>-1</sup>). HRMS (ESI, negative): [M-NH<sub>4</sub>]<sup>-</sup> found  $m/z$  316.9443, calculated for C<sub>12</sub>H<sub>7</sub>(35)Cl<sub>2</sub>O<sub>4</sub>S 316.9442.

#### 2.5. Sulfuric acid mono-(2,4'-dichloro-biphenyl-4-yl) ester, ammonium salt (9f)

White solid; mp: 190-192 °C; <sup>1</sup>H NMR (400 MHz, CD<sub>3</sub>OD):  $\delta$ /ppm 7.30 (m, 2H), 7.34-7.43 (m, 4H), 7.47 (dd, 1H,  $J$  = 0.9 Hz,  $J$  = 1.7 Hz). <sup>13</sup>C NMR (100 MHz, CD<sub>3</sub>OD):  $\delta$ /ppm 121.3 (CH), 123.7 (CH), 129.3 (2×CH), 132.1 (2×CH), 132.6 (CH), 133.3, 134.7, 137.0, 139.0, 154.2 ( $C_{Ar}$ -OSO<sub>3</sub>). IR (KBr): 3240, 3072, 1263, 1212, 1054, 924, 811 cm<sup>-1</sup>. UV/Vis:  $\lambda_{9f,max}$ (MeOH) = 247 nm,  $\epsilon_{9f}$  = 1.58×10<sup>4</sup> L·mol<sup>-1</sup>·cm<sup>-1</sup> ( $\lambda_{7f,max}$ (MeOH) = 255 nm,  $\epsilon_{7f}$  = 1.66×10<sup>4</sup> L·mol<sup>-1</sup>·cm<sup>-1</sup>). HRMS (ESI, negative): [M-NH<sub>4</sub>]<sup>-</sup> found  $m/z$  316.9452, calculated for C<sub>12</sub>H<sub>7</sub>(35)Cl<sub>2</sub>O<sub>4</sub>S 316.9442.

**2.6. Sulfuric acid mono-(3',4'-dichloro-biphenyl-4-yl) ester, ammonium salt (9g)**

White solid; mp: 230 °C (dec.);  $^1\text{H}$  NMR (400 MHz,  $\text{CD}_3\text{OD}$ ):  $\delta/\text{ppm}$  7.40 (AA'XX' system, 2H,  $J \sim 9.0$  Hz), 7.51 (dd, 1H,  $J = 2.0$  Hz,  $J = 8.3$  Hz), 7.54 (dd, 1H,  $J = 0.4$  Hz,  $J = 8.3$  Hz), 7.57 (AA'XX' system, 2H,  $J \sim 9.0$  Hz), 7.73 (dd, 1H,  $J = 0.4$  Hz,  $J = 2.0$  Hz).  $^{13}\text{C}$  NMR (100 MHz,  $\text{CD}_3\text{OD}$ ):  $\delta/\text{ppm}$  122.9 (2 $\times$ CH), 127.6 (CH), 128.7 (2 $\times$ CH), 129.7 (CH), 131.9 (CH), 132.1, 133.7, 136.3, 142.3, 154.3 ( $\text{C}_{\text{Ar}}\text{-OSO}_3$ ). IR (KBr): 3222, 3075, 1256, 1057  $\text{cm}^{-1}$ . UV/Vis:  $\lambda_{9\text{g,max}}(\text{MeOH}) = 262$  nm,  $\epsilon_{9\text{g}} = 2.56 \times 10^4$   $\text{L}\cdot\text{mol}^{-1}\cdot\text{cm}^{-1}$  ( $\lambda_{7\text{g,max}}(\text{MeOH}) = 272$  nm,  $\epsilon_{7\text{g}} = 2.32 \times 10^4$   $\text{L}\cdot\text{mol}^{-1}\cdot\text{cm}^{-1}$ ). HRMS (ESI, negative):  $[\text{M-NH}_4]^-$  found  $m/z$  316.9451, calculated for  $\text{C}_{12}\text{H}_7(35)\text{Cl}_2\text{O}_4\text{S}$  316.9442.

**2.7. Sulfuric acid mono-(2,3',4'-trichloro-biphenyl-4-yl) ester, ammonium salt (9h)**

White solid; mp: 160-162 °C;  $^1\text{H}$  NMR (400 MHz,  $\text{CD}_3\text{OD}$ ):  $\delta/\text{ppm}$  7.30-7.35 (m, 3H), 7.50 (m, 1H), 7.54-7.58 (m, 2H).  $^{13}\text{C}$  NMR (100 MHz,  $\text{CD}_3\text{OD}$ ):  $\delta/\text{ppm}$  121.4 (CH), 123.7 (CH), 130.5 (CH), 131.3 (CH), 132.5 (CH), 132.5 (CH), 132.7, 133.0, 133.3, 135.6, 140.6, 154.5 ( $\text{C}_{\text{Ar}}\text{-OSO}_3$ ). IR (KBr): 3240, 3086, 1269, 1256, 1209, 1056  $\text{cm}^{-1}$ . HRMS (ESI, negative):  $[\text{M-NH}_4]^-$  found  $m/z$  350.9053, calculated for  $\text{C}_{12}\text{H}_6(35)\text{Cl}_3\text{O}_4\text{S}$  350.9052.

**2.8. Sulfuric acid mono-(2',3,5'-trichloro-biphenyl-4-yl) ester, ammonium salt (9i)**

White solid; mp: 200 °C (dec.);  $^1\text{H}$  NMR (400 MHz,  $\text{CD}_3\text{OD}$ ):  $\delta/\text{ppm}$  7.31 (dd, 1H,  $J = 2.2$  Hz,  $J = 8.5$  Hz), 7.35 (dd, 1H,  $J = 2.2$  Hz,  $J = 8.5$  Hz), 7.38 (dd, 1H,  $J = 0.4$  Hz,  $J = 2.2$  Hz), 7.47 (d, 1H,  $J = 2.2$  Hz), 7.48 (dd, 1H,  $J = 0.4$  Hz,  $J \sim 8.0$  Hz), 7.71 (dd, 1H,  $J = 0.3$  Hz,  $J = 8.5$  Hz).  $^{13}\text{C}$  NMR (100 MHz,  $\text{CD}_3\text{OD}$ ):  $\delta/\text{ppm}$  123.4 (CH), 127.4, 129.6 (CH), 130.2 (CH), 131.9 (CH), 132.0, 132.1 (CH), 132.5 (CH), 134.0, 136.7, 141.7, 150.0 ( $\text{C}_{\text{Ar}}\text{-OSO}_3$ ). IR (KBr): 3495,

3270, 1246, 1051  $\text{cm}^{-1}$ . UV/Vis:  $\lambda_{9i,\text{max}}(\text{MeOH}) = 249 \text{ nm}$ ,  $\epsilon_{9i} = 1.17 \times 10^4 \text{ L}\cdot\text{mol}^{-1}\cdot\text{cm}^{-1}$   
( $\lambda_{7i,\text{max}}(\text{MeOH}) = 259 \text{ nm}$ ,  $\epsilon_{7i} = 1.11 \times 10^4 \text{ L}\cdot\text{mol}^{-1}\cdot\text{cm}^{-1}$ ). HRMS (ESI, negative):  $[\text{M}\text{-NH}_4]^-$   
found  $m/z$  350.9062, calculated for  $\text{C}_{12}\text{H}_6(35)\text{Cl}_3\text{O}_4\text{S}$  350.9052.

### 2.9. Sulfuric acid mono-(2',3,4'-trichloro-biphenyl-4-yl) ester, ammonium salt (9j)

White solid; mp: 185 °C (dec.);  $^1\text{H}$  NMR (400 MHz,  $\text{CD}_3\text{OD}$ ):  $\delta/\text{ppm}$  7.27-7.38 (m, 3H),  
7.45 (d, 1H,  $J = 2.1 \text{ Hz}$ ), 7.54 (d, 1H,  $J = 2.1 \text{ Hz}$ ), 7.70 (d, 1H,  $J = 8.5 \text{ Hz}$ ).  $^{13}\text{C}$  NMR (100 MHz,  
 $\text{CD}_3\text{OD}$ ):  $\delta/\text{ppm}$  123.4 (CH), 127.3, 128.6 (CH), 129.6 (CH), 130.7 (CH), 131.9 (CH), 133.5  
(CH), 134.3, 135.3, 136.8, 138.9, 150.0 ( $\text{C}_{\text{Ar}}\text{-OSO}_3$ ). IR (KBr): 3464, 1249, 1080, 1057, 822  $\text{cm}^{-1}$ .  
 $^1$ . UV/Vis:  $\lambda_{9a,\text{max}}(\text{MeOH}) = 251 \text{ nm}$ ,  $\epsilon_{9a} = 1.38 \times 10^4 \text{ L}\cdot\text{mol}^{-1}\cdot\text{cm}^{-1}$  ( $\lambda_{7a,\text{max}}(\text{MeOH}) = 260 \text{ nm}$ ,  
 $\epsilon_{7a} = 1.52 \times 10^4 \text{ L}\cdot\text{mol}^{-1}\cdot\text{cm}^{-1}$ ). HRMS (ESI, negative):  $[\text{M}\text{-NH}_4]^-$  found  $m/z$  350.9045, calculated  
for  $\text{C}_{12}\text{H}_6(35)\text{Cl}_3\text{O}_4\text{S}$  350.9052.
